# Supplementary material for: In silico investigation of DNA minor groove binding bibenzimidazoles in the context of UVA phototherapy
Source: Royal Society of Chemistry journal article supplement (doi:10.1039/d1cp04841d), 2021-12-06
Supplement: d1cp04841d1.pdf [file d1cp04841d1.pdf]

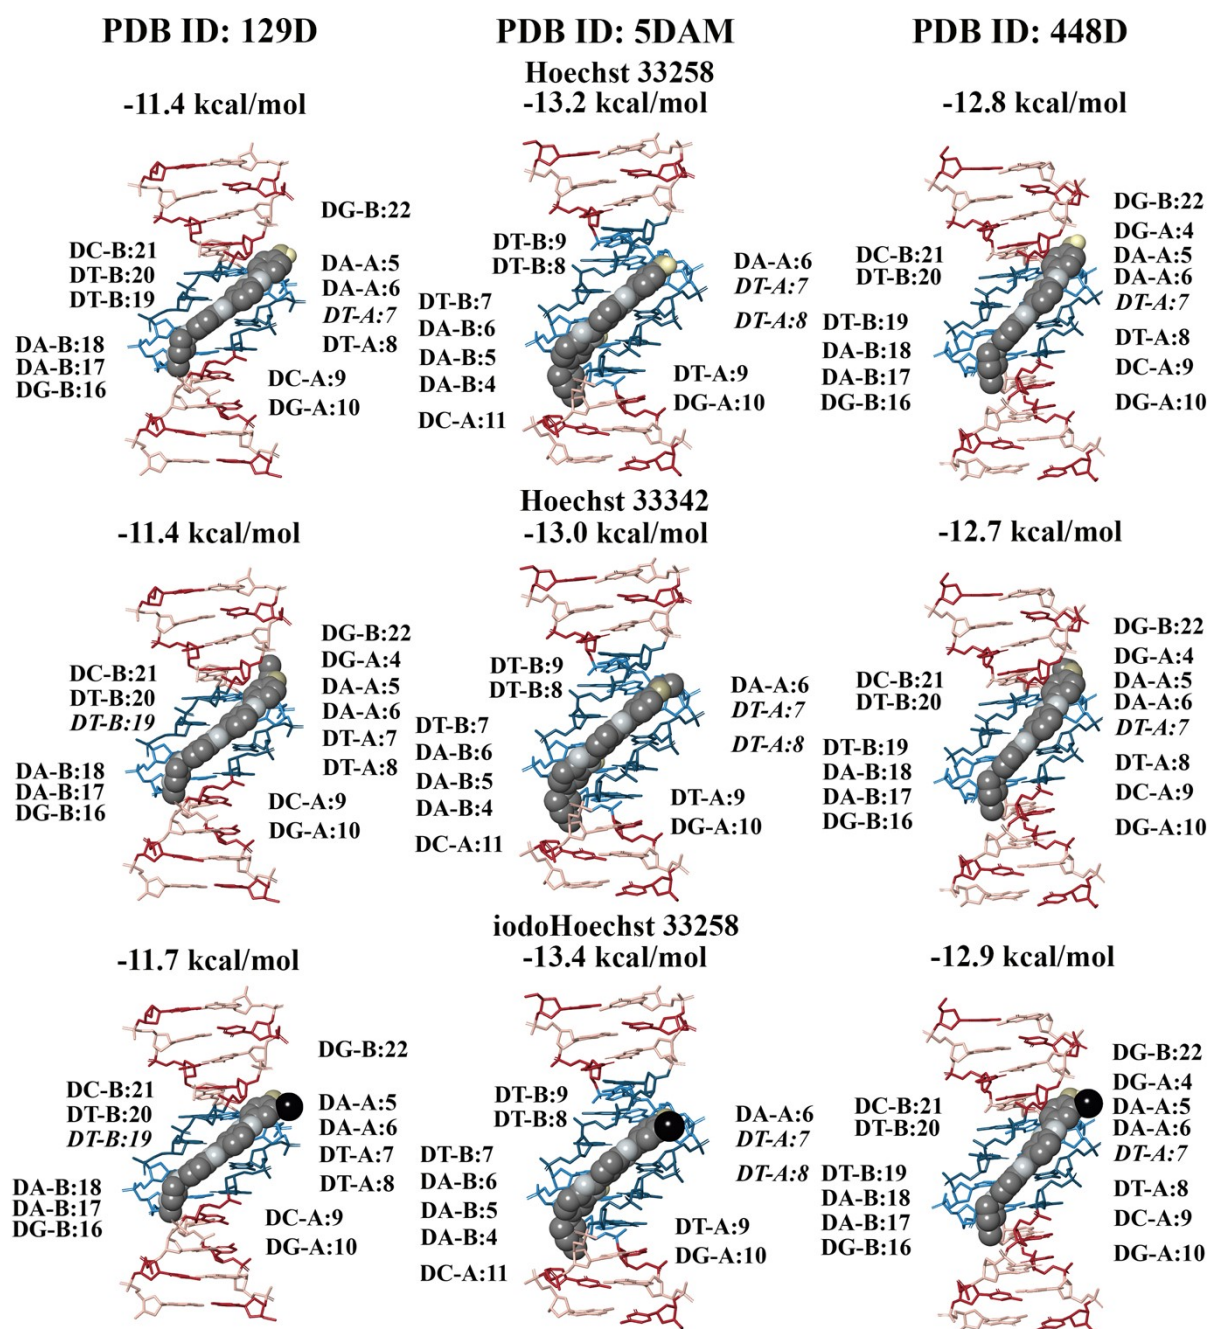

**Figure S1:** Molecular docking of the commercially available Hoechst 33258 and Hoechst 33342 ligands, as well as iodoHoechst 33258 to B-DNA (PDB ID: 129D, 5DAM, and 448D). The bases A, T, C, and G are coloured cyan, dark teal, dark red, and pink, respectively. Iodine atoms are coloured black, hydrogen atoms are coloured light yellow, nitrogen atoms are coloured silver, and oxygen atoms are coloured tan.

**PDB ID: 129D**

**-11.7 kcal/mol**

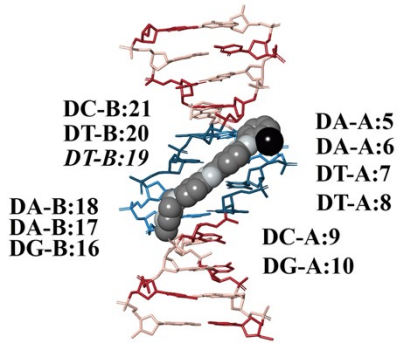

**PDB ID: 5DAM**

*ortho*-iodoHoechst

**-13.3 kcal/mol**

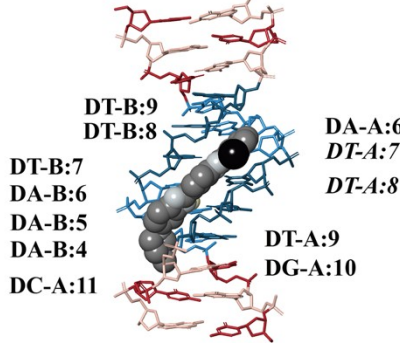

**PDB ID: 448D**

**-12.8 kcal/mol**

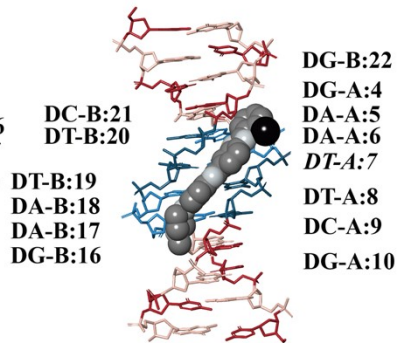

**-11.6 kcal/mol**

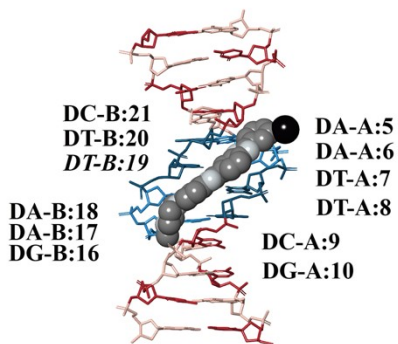

*meta*-iodoHoechst

**-13.3 kcal/mol**

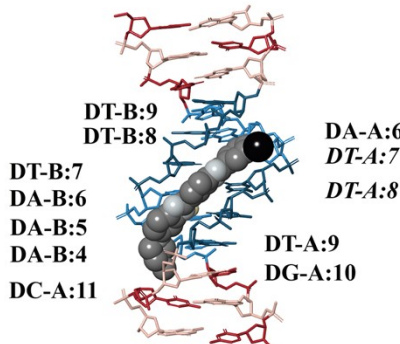

**-12.9 kcal/mol**

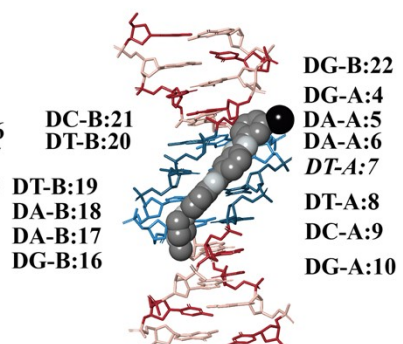

**-11.9 kcal/mol**

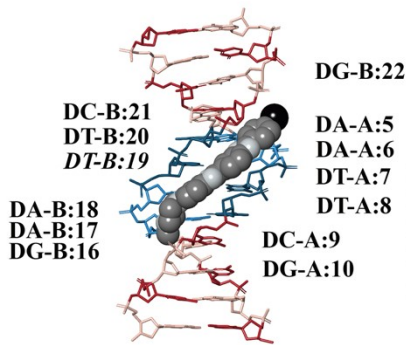

*para*-iodoHoechst

**-13.2 kcal/mol**

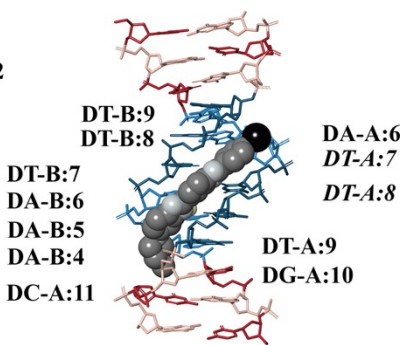

**-13.0 kcal/mol**

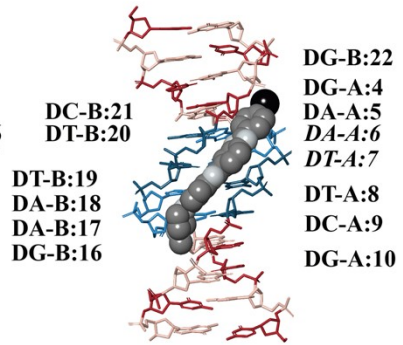

**-11.5 kcal/mol**

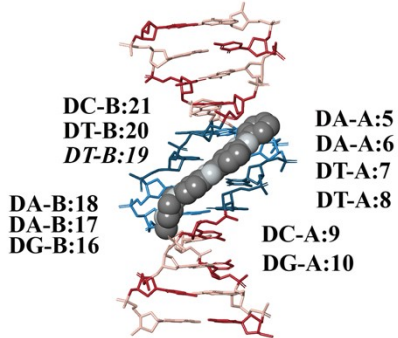

phenylHoechst

**-13.1 kcal/mol**

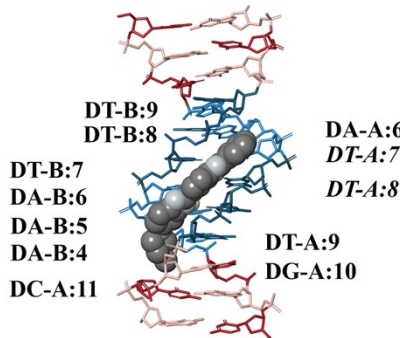

**-12.7 kcal/mol**

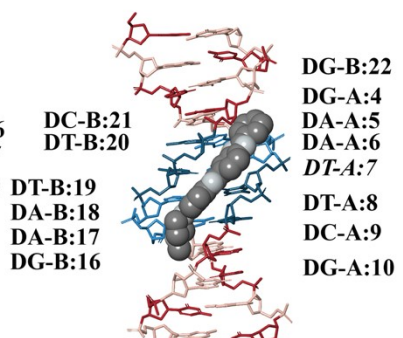

**Figure S2:** Molecular docking of the *ortho*-, *meta*-, and *para*-iodoHoechst ligands to B-DNA (PDB ID: 129D, 5DAM, and 448D). The bases A, T, C, and G are coloured cyan, dark teal, dark red, and pink, respectively. Iodine atoms are coloured black, hydrogen atoms are coloured light yellow, nitrogen atoms are coloured silver, and oxygen atoms are coloured tan.

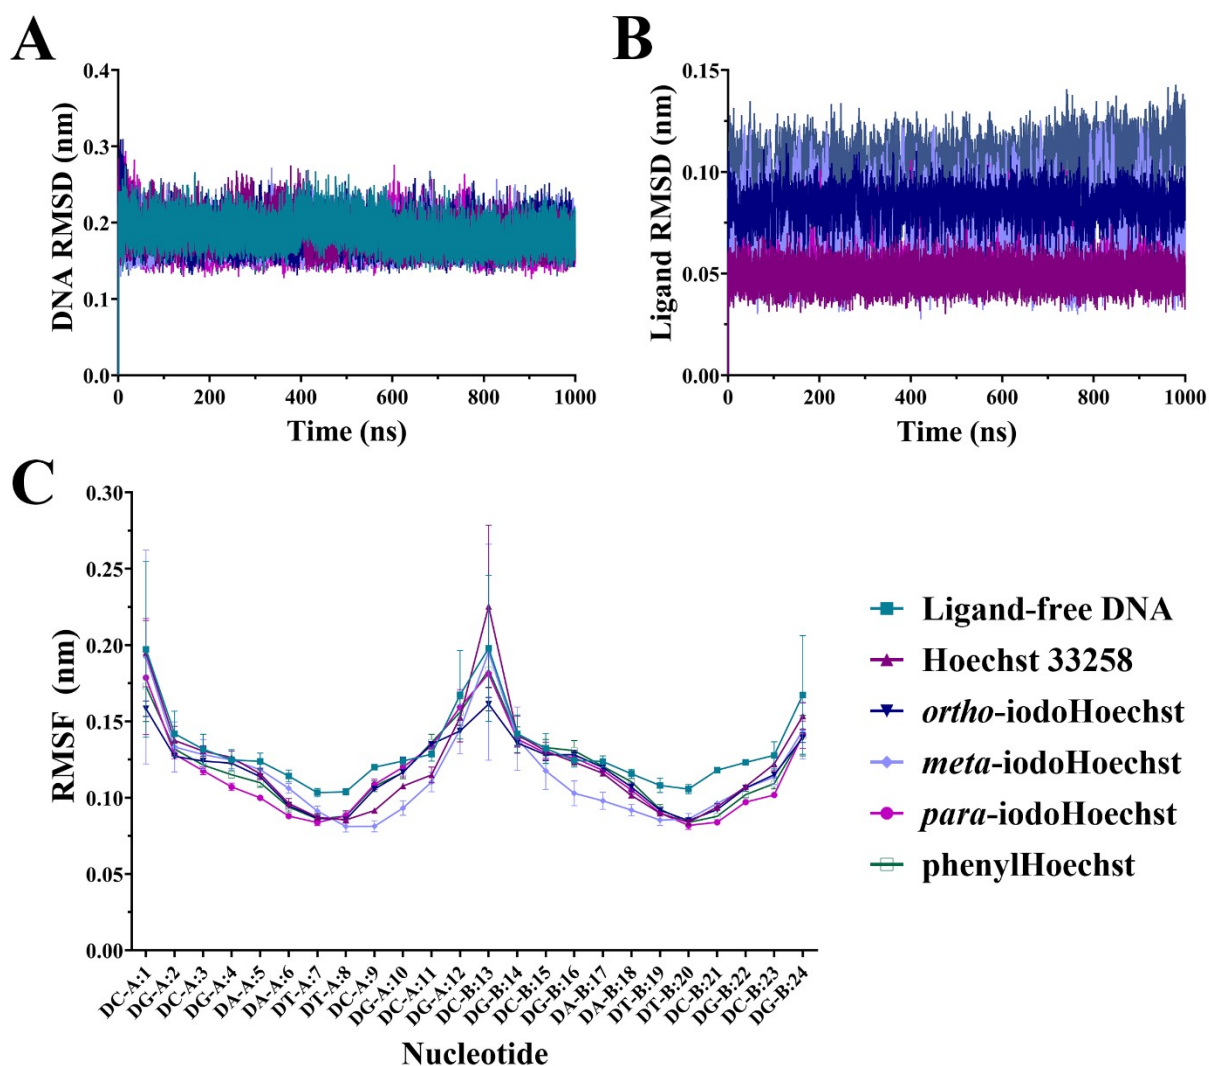

**Figure S3:** Stability of DNA dodecamer in complex with Hoechst ligands. Root mean square deviation (RMSD) for was calculated for DNA (A) and Hoechst ligands (B). Root mean square fluctuation (RMSF) was calculated for DNA (C), with values shown was mean  $\pm$  SD. Simulations were carried out for 1000 ns in triplicate for each system.



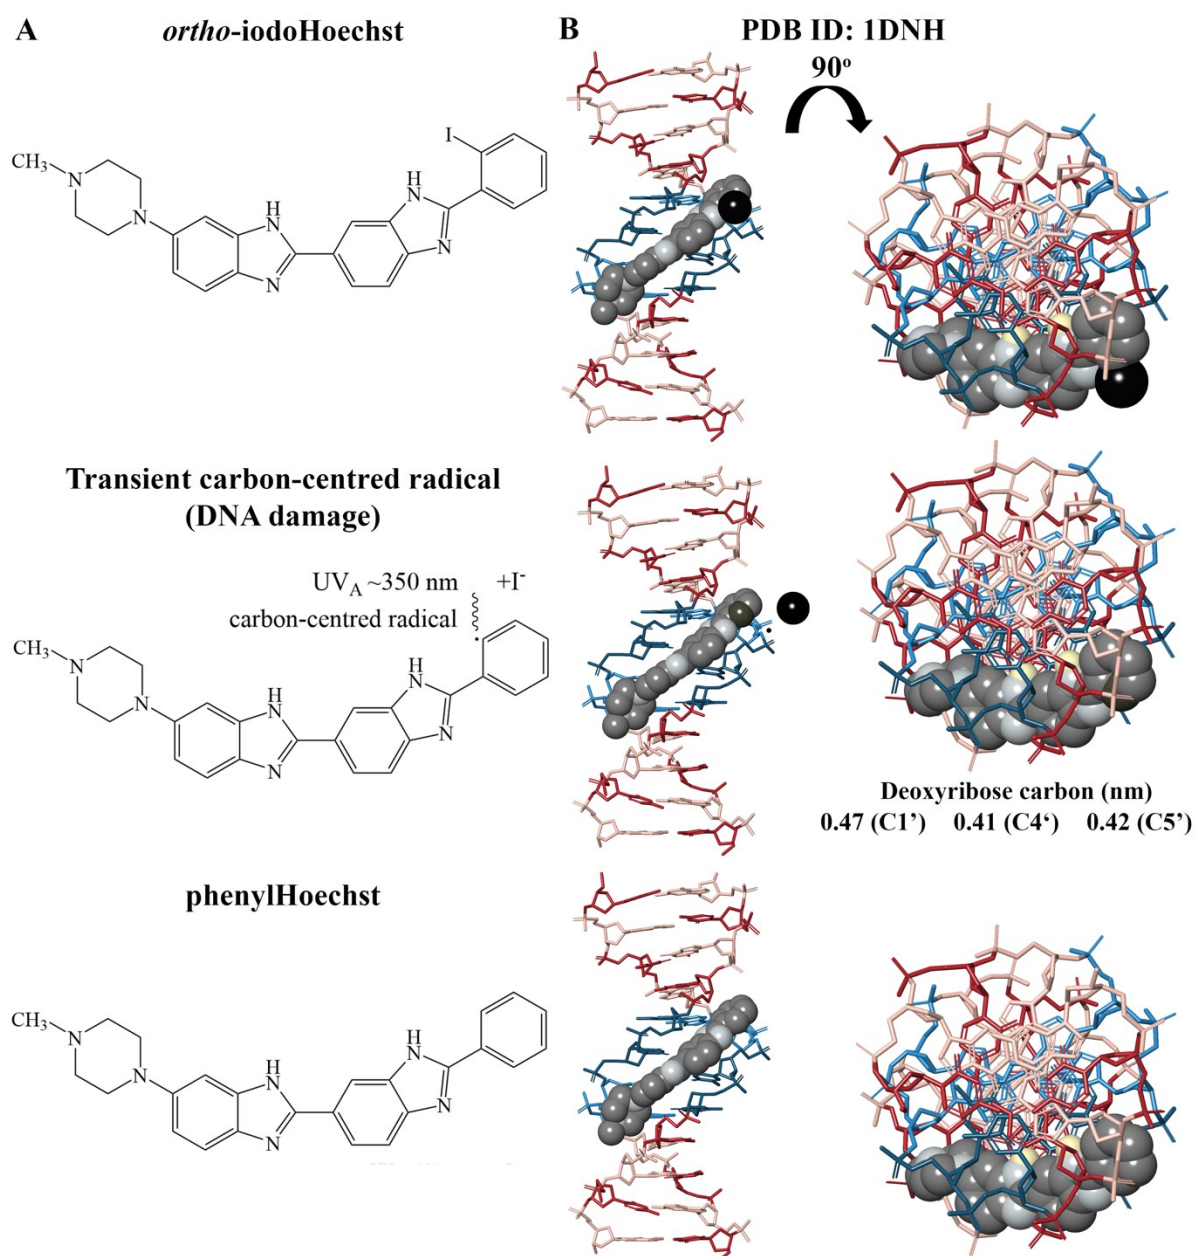

**Figure S4:** Photodehalogenation of *ortho*-iodoHoechst to phenylHoechst. The chemical structures of *ortho*-iodoHoechst, the carbon-centred radical, and phenylHoechst that are formed from the process of photodehalogenation can be seen. The docked ligands in the minor groove of B-DNA are shown (PDB ID: 1DNH) and the distances of the carbon-centred radical from the deoxyribose carbon (C1', C4', and C5') are provided.

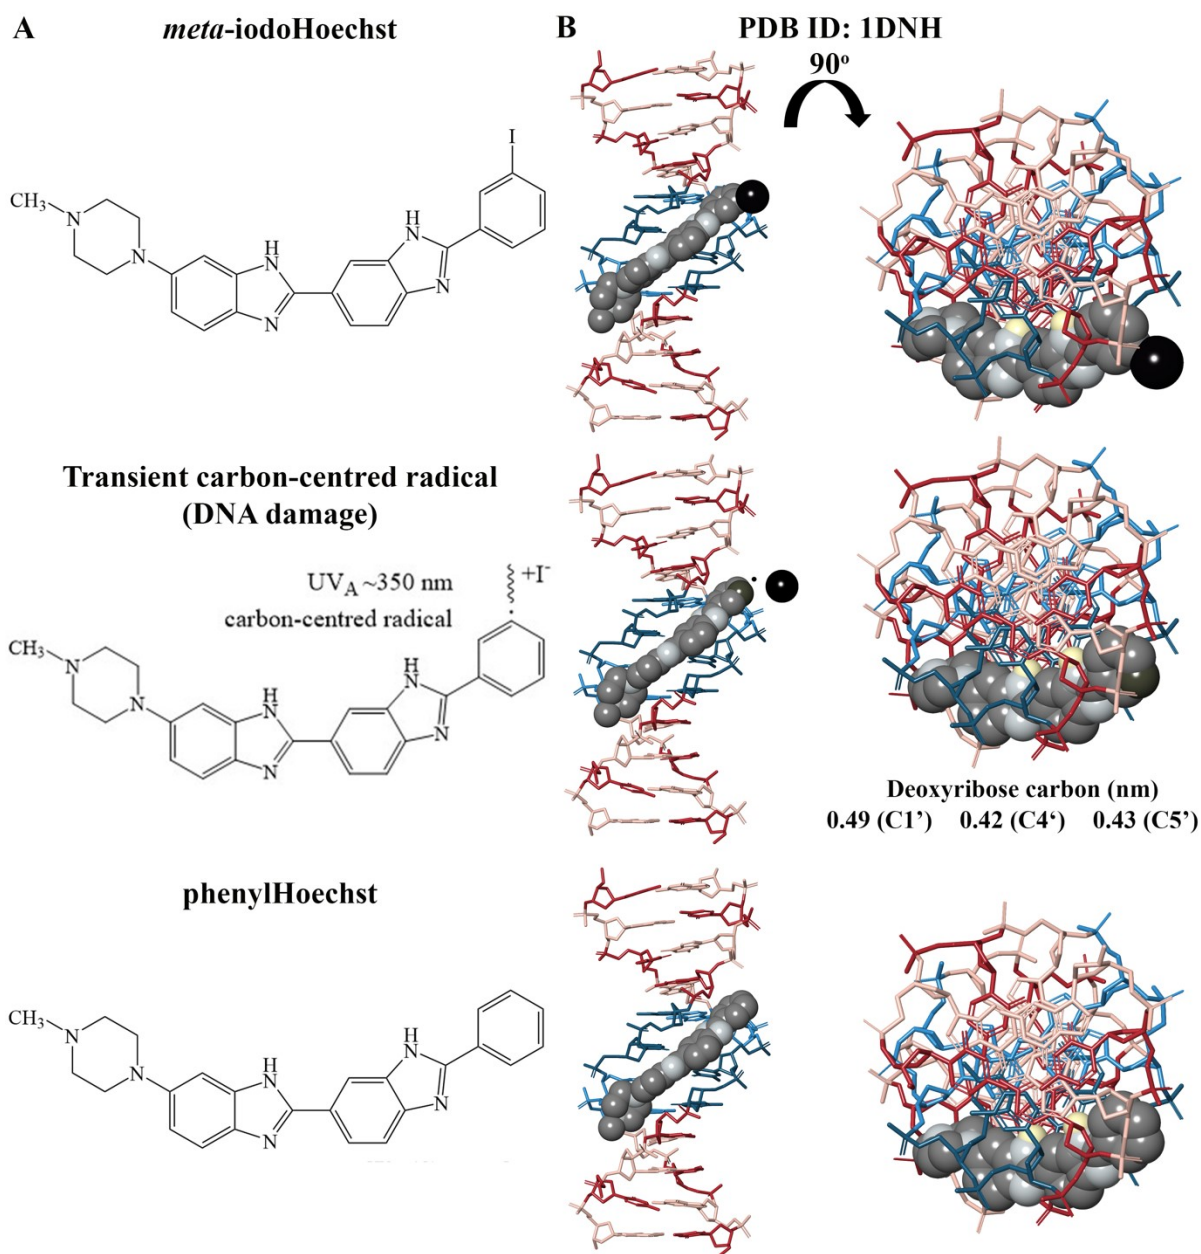

**Figure S5:** Photodehalogenation of *meta*-iodoHoechst to phenylHoechst. The chemical structures of *meta*-iodoHoechst, the carbon-centred radical, and phenylHoechst that are formed from the process of photodehalogenation can be seen. The docked ligands in the minor groove of B-DNA are shown (PDB ID: 1DNH) and the distances of the carbon-centred radical from the deoxyribose carbon (C1', C4', and C5') are provided.

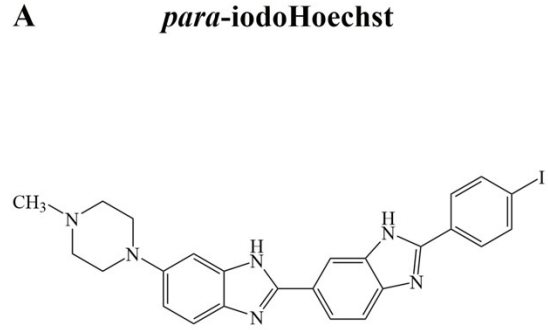

**Transient carbon-centred radical  
(DNA damage)**

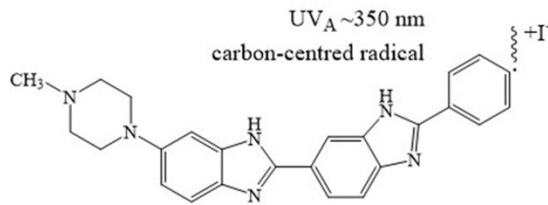

**phenylHoechst**

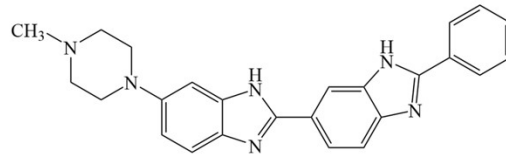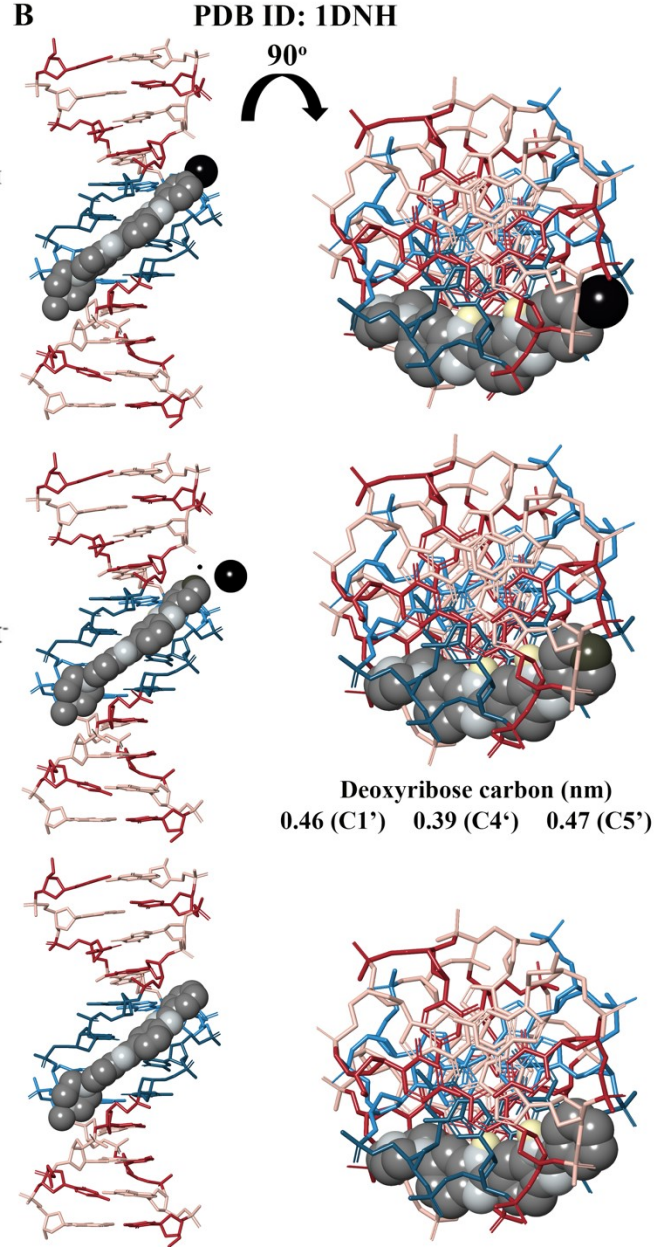

**Figure S6:** Photodehalogenation of *para*-iodoHoechst to phenylHoechst. Photodehalogenation of *para*-iodoHoechst. The chemical structures of *para*-iodoHoechst, the carbon-centred radical, and phenylHoechst that are formed from the process of photodehalogenation can be seen. The docked ligands in the minor groove of B-DNA are shown (PDB ID: 1DNH) and the distances of the carbon-centred radical from the deoxyribose carbon (C1', C4', and C5') are provided

**Table S1.** Iterative docking results of *ortho*-iodoHoechst to the human nucleosome structure (PDB ID: 2CV5).

| Ligand # | $\Delta G$<br>(kcal/mol) | Binding site | Chain I                                                         | Chain J                                               | Histone proteins                          |
|----------|--------------------------|--------------|-----------------------------------------------------------------|-------------------------------------------------------|-------------------------------------------|
| 1        | -11.6                    | DNA          | DA-110, DA-109,<br>DC-108, DC-107,<br>DT-106, DT-105,<br>DT-104 | DG-185, DG-186, DA-<br>187, DA-188, DA-189,<br>DC-190 | None                                      |
| 2        | -11.7                    | DNA          | DA-54, DA-55, DA-<br>56, DA-57, DG-58,<br>DG-59                 | DT-237, DT-238, DT-<br>239, DG-240, DA-241            | ARG-A:63                                  |
| 3        | -11.5                    | DNA          | DC-44, DT-45, DG-<br>46, DC-47, DT-48,<br>DC-49                 | DG-246, DC-247, DA-<br>248, DG-249, DT-250,<br>DT-251 | ARG-H:28, THR-B:80, ARG-A:83,<br>GLN-A:85 |
| 4        | -11.2                    | DNA          | DT-74, DT-75, DC-<br>76, DA-77, DG-78,<br>DC-79                 | DT-216, DG-217, DA-<br>218, DA-219, DT-220,<br>DT-221 | None                                      |
| 5        | -11.0                    | DNA          | DA-27, DC-26, DC-<br>25, DA-24, DT-23,                          | DG-268, DT-269, DA-<br>270, DG-271, DA-272,           | ARG-D:30, ARG-D:28                        |

|    |       |     | DC-22                                                  | DA-273                                                |                                                               |
|----|-------|-----|--------------------------------------------------------|-------------------------------------------------------|---------------------------------------------------------------|
| 6  | -13.1 | DNA | DT-142, DA-141,<br>DT-140, DA-139,<br>DG-138, DG-137   | DA-153, DT-154, DC-<br>155, DC-156, DA-157,<br>DC-158 | ARG-A:52, ARG-A:49, THR-A:45,<br>TYR-A:41                     |
| 7  | -10.8 | DNA | DA-99, DG-98, DG-<br>97, DT-96, DA-95,<br>DG-94, DA-99 | DA-197, DT-198, DC-<br>199, DA-200                    | ARG-F:19, ASP-E:81, LEU-E:82,<br>ARG-E:83                     |
| 8  | -11.0 | DNA | DA-19, DG-18, DA-<br>17, DC-16, DG-15,<br>DT-14        | DG-277, DC-278, DA-<br>279, DG-280, DG-281            | PRO-C:80, ILE-C:79, ARG-C:77,<br>SER-D:52, SER-D:53, LYS-D:54 |
| 9  | -11.3 | DNA | DC-60, DA-61, DT-<br>62, DG-63, DT-64                  | DA-231, DT-232, DG-<br>233, DC-235, DT-236            | None                                                          |
| 10 | -11.7 | DNA | DA-115, DC-114,<br>DA-113, DT-112,<br>DA-111           | DG-179, DT-180, DA-<br>181, DT-182, DT-183,<br>DT-184 | None                                                          |
| 11 | -10.9 | DNA | DA-127, DA-126,<br>DG-125, DA-124,<br>DT-123, DG-122   | DC-168, DT-169, DA-<br>170, DC-171, DC-172,<br>DA-173 | ARG-H:28                                                      |
| 12 | -10.8 | DNA | DA-133, DC-132,<br>DG-131, DT-130                      | DG-161, DC-162, DA-<br>163, DG-164, DA-165,<br>DT-166 | ARG-G:77, ILE-G:79, SER-H:52                                  |
| 13 | -12.0 | DNA | DA-41, DG-40, DG-<br>39, DT-38, DT-37                  | DC-253, DC-254, DA-<br>255, DA-256, DA-257,<br>DT-258 | THR-D:87, THR-D:85, ARG-D:83,<br>ARG-C:42                     |
| 14 | -10.6 | DNA | DT-90, DT-91, DT-<br>92, DT-93, DG-94,                 | DA-200, DA-201, DA-<br>202, DA-203, DG-204,           | None                                                          |



|    |       |         | DA-95                                           | DG-205                                                 |                                                                                                                                                                                                                  |
|----|-------|---------|-------------------------------------------------|--------------------------------------------------------|------------------------------------------------------------------------------------------------------------------------------------------------------------------------------------------------------------------|
| 15 | -10.8 | DNA     | DA-83, DC-84, DA-85, DT-86, DG-87, DC-88, DC-89 | DA-207, DT-208, DG-209, DT-210, DT-211                 | None                                                                                                                                                                                                             |
| 16 | -10.6 | DNA     | DT-32, DG-33, DT-34, DA-35, DT-36, DT-37        | DA-259, DC-260, DA-261, DC-262, DT-263                 | ARG-C:42                                                                                                                                                                                                         |
| 17 | -10.9 | DNA     | DC-12, DA-11, DC-10, DC-9, DT-8                 | DG-283, DG-284, DA-285, DT-286, DA-287, DT-288         | None                                                                                                                                                                                                             |
| 18 | -10.6 | DNA     | DT-70, DG-71, DA-72, DA-73, DT-74               | DG-224, DA-223, DC-222, DT-221, DT-220                 | None                                                                                                                                                                                                             |
| 19 | -10.5 | DNA     | DC-50, DA-51, DT-52, DC-53                      | DG-240, DA-241, DT-242, DG-243, DG-244, DA-245, DG-246 | None                                                                                                                                                                                                             |
| 20 | -9.8  | DNA     | DG-63, DT-64, DT-65, DC-66                      | DG-227, DA-228, DA-229, DC-230                         | LYS-B:31, ARG-B:35, GLU-A:50, VAL-A:46                                                                                                                                                                           |
| 21 | -10.5 | Histone | None                                            | None                                                   | TYR-H:80, HIS-H:79, ARG-H:76, SER-H:75, GLY-H:72, GLY-D:72, SER-D:75, ARG-D:76, HIS-D:79, GLU-H:68, GLY-G:37, ASN-G:38, TYR-G:39, TYR-C:39, ASN-C:38, GLY-C:37, GLU-D:68, PHE-D:67, ASN-D:64, MET-F:84, TYR-F:88 |
| 22 | -10.0 | DNA     | DG-94, DT-93, DT-92, DT-91, DT-90,              | DT-198, DC-199, DA-200, DA-201, DA-202,                | GLN-E:68, LEU-E:65                                                                                                                                                                                               |

|    |       |         | DC-89                                                  | DA-203                                                 |                                                                                                                                                                                                                                                               |
|----|-------|---------|--------------------------------------------------------|--------------------------------------------------------|---------------------------------------------------------------------------------------------------------------------------------------------------------------------------------------------------------------------------------------------------------------|
| 23 | -9.8  | DNA     | DA-28, DA-29, DA-30, DG-31, DT-32, DG-33, DT-34        | DT-258, DA-259, DC-260, DA-261, DC-262, DT-263         | ARG-C:35, ARG-C:17                                                                                                                                                                                                                                            |
| 24 | -9.8  | DNA     | DT-74, DA-73, DA-72, DG-71, DT-70, DC-69               | DG-217, DA-218, DA-219, DT-220, DT-221, DC-222, DA-223 | ALA-E:114, LYS-E:115, LYS-A:115                                                                                                                                                                                                                               |
| 25 | -10.1 | DNA     | DG-81, DA-82, DA-83, DC-84, DT-6, DA-7                 | DT-208, DG-209, DT-210                                 | TYR-E:41, HIS-E:39, LYS-F:31, PRO-F:32, ARG-F:35, GLU-E:50, VAL-E:46                                                                                                                                                                                          |
| 26 | -11.3 | DNA     | DC-101, DA-102, DG-103, DT-104                         | DT-191, DG-192, DC-193, DT-194, DC-195                 | LYS-D:27, SER-D:29, GLN-E:85                                                                                                                                                                                                                                  |
| 27 | -10.8 | Histone | None                                                   | None                                                   | ARG-F:40, GLU-E:97, ALA-E:98, TYR-E:99, VAL-E:101, GLY-E:102, GLU-E:105, ASP-E:106, GLY-A:132, ARG-A:131, ILE-A:130, VAL-C:107, GLY-C:106, GLY-C:105, ILE-C:102, THR-C:101, VAL-C:100, ARG-C:99, ARG-E:131, GLU-E:133, ARG-G:99, ARG-F:95, GLN-C:84, ARG-C:88 |
| 28 | -9.8  | DNA     | DT-136, DG-135, DG-134, DA-133, DC-132, DG-131, DT-130 | DC-156, DA-157, DC-158, DC-159, DT-160                 | LYS-G:74, LYS-G:75                                                                                                                                                                                                                                            |

|    |       |             |                                                |                                                        |                                                                                                                                                                                                                                                                                                         |
|----|-------|-------------|------------------------------------------------|--------------------------------------------------------|---------------------------------------------------------------------------------------------------------------------------------------------------------------------------------------------------------------------------------------------------------------------------------------------------------|
| 29 | -9.9  | DNA         | DA-19, DT-20, DT-21, DC-22, DT-23, DA-24       | DT-269, DG-268, DG-267                                 | LYS-D:40, TYR-D:39, VAL-D:36, SER-D:35, ILE-D:51, SER-D:52, SER-D:53, MET-D:56                                                                                                                                                                                                                          |
| 30 | -9.8  | DNA/Histone | DA-83, DC-84, DT-92, DT-91                     | DC-206, DA-207, DT-208                                 | LYS-E:64, ARG-E:63, ILE-E:62, LEU-E:61, LEU-E:60, GLU-E:59, TYR-E:54, ARG-E:53, GLU-E:50, ARG-F:36, ARG-F:35                                                                                                                                                                                            |
| 31 | -9.6  | DNA         | DT-117, DC-116, DA-115, DC-114, DA-113, DT-112 | DA-174, DA-175, DA-176, DG-177, DT-178, DG-179, DT-180 | ARG-G:35, ARG-G:17                                                                                                                                                                                                                                                                                      |
| 32 | -10.1 | Histone     | None                                           | None                                                   | ALA-E:135, LEU-A:109, ASP-A:106, GLU-A:105, GLY-A:102, VAL-A:101, ALA-A:98, GLU-A:97, GLU-A:94, GLN-A:93, ARG-B:40, THR-A:58, LEU-A:60, VAL-G:107, GLY-G:106, GLY-G:105, GLN-G:104, ALA-G:103, ILE-G:102, THR-G:101, VAL-G:100, GLY-G:98, GLN-G:84, ARG-G:88, ASN-G:94, ARG-E:129, ILE-E:130, ARG-A:131 |
| 33 | -9.6  | DNA         | DT-123, DA-124, DG-125, DA-126, DA-127         | DT-169, DC-168, DT-167, DT-166, DA-165                 | SER-H:35, VAL-H:36, TYR-H:39                                                                                                                                                                                                                                                                            |
| 34 | -9.7  | DNA         | None                                           | DC-155, DC-156, DA-157, DC-158, DC-159, DT-160         | LYS-G:74, ASN-G:73, SER-A:57, LYS-A:56, ARG-A:53, ARG-A:52                                                                                                                                                                                                                                              |

|    |       |             |                                                                 |                                                               |                                                                                                                                                                                 |
|----|-------|-------------|-----------------------------------------------------------------|---------------------------------------------------------------|---------------------------------------------------------------------------------------------------------------------------------------------------------------------------------|
| 35 | -9.6  | DNA         | DT-143, DG-144,<br>DA-145, DT-146                               | DT-152, DA-151. DA-<br>150, DC-149, DT-148                    | ARG-A:40, HIS-A:39, PRO-A:38                                                                                                                                                    |
| 36 | -9.5  | DNA         | DC-13, DC-12, DA-<br>11, DC-10                                  | DG-277, DC-278, DA-<br>279, DG-280, DG-281,<br>DT-282, DG-283 | LYS-C:75, LYS-C:74                                                                                                                                                              |
| 37 | -9.5  | DNA         | DT-106, DT-105,<br>DT-104, DG-103,<br>DA-102, DC-101,<br>DG-100 | DG-185, DG-186, DA-<br>187, DA-188, DA-189,<br>DC-190, DT-191 | ARG-H:83, LYS-F:77                                                                                                                                                              |
| 38 | -9.8  | DNA/Histone | DC-101, DA-102                                                  | DA-187                                                        | HIS-F:75, ALA-F:76, LYS-F:77,<br>ARG-F:78, ARG-H:83, LYS-H:82,<br>ASN-H:81, TYR-H:80, LYS-D:31,<br>MET-F:84, ALA-F:83, THR-F:82,<br>GLN-E:85, SER-E:87, GLY-F:102,<br>PHE-F:100 |
| 39 | -9.5  | DNA         | DA-11, DC-10, DC-<br>9, DT-8, DA-7                              | None                                                          | ARG-E:49, LYS-C:75, LYS-C:74,<br>ASN-C:73                                                                                                                                       |
| 40 | -9.5  | DNA/Histone | DG-40, DA-41, DA-<br>42, DA-43, DC-44                           | DT-250, DG-249, DA-<br>248                                    | ALA-B:76, ARG-B:78, TYR-B:88,<br>ASP-B:85, MET-B:84, TYR-D:80,<br>ASN-D:81                                                                                                      |
| 41 | -10.1 | DNA         | DT-38, DG-39, DG-<br>40                                         | DC-254, DC-253, DT-<br>252, DT-251, DT-250                    | ARG-D:83, ASN-D:81, HIS-B:75,<br>ALA-B:76, LYS-B:77                                                                                                                             |
| 42 | -9.4  | DNA         | DA-133, DG-134,<br>DG-135, DT-136,<br>DG-137, DG-138            | DG-161, DT-160, DC-<br>159, DC-158, DA-157                    | None                                                                                                                                                                            |
| 43 | -9.3  | DNA         | DT-48, DC-49, DC-                                               | DG-243, DT-242, DA-                                           | LEU-A:65                                                                                                                                                                        |



|    |       |             |                                                                   |                                                               |                                                                                                                                  |
|----|-------|-------------|-------------------------------------------------------------------|---------------------------------------------------------------|----------------------------------------------------------------------------------------------------------------------------------|
|    |       |             | 50, DA-51, DT-52,<br>DC-53, DA-54, DA-<br>55                      | 241, DG-240, DT-239,<br>DT-238, DT-237                        |                                                                                                                                  |
| 44 | -9.3  | DNA         | DT-48, DC-49, DC-<br>50, DA-51, DT-52,<br>DC-53, DA-54, DA-<br>55 | DG-243, DT-242, DA-<br>241, DG-240, DT-239,<br>DT-238, DT-237 | LEU-A:65                                                                                                                         |
| 45 | -9.3  | DNA/Histone | DG-58, DG-59, DC-<br>60, DA-61                                    | DA-231, DT-232, DT-<br>238                                    | ARG-A:53, TYR-A:54, PRO-B:32,<br>ARG-B:36, GLU-A:59, LEU-A:60,<br>ILE-A:62, ARG-A:63, LYS-A:64                                   |
| 46 | -9.2  | DNA/Histone | DT-38, DG-39                                                      | DT-250, DG-249                                                | SER-D:84, LYS-D:82, ASN-D:81,<br>LYS-H:31, ARG-H:30                                                                              |
| 47 | -10.8 | DNA/Histone | DT-93                                                             | DC-195, DC-196, DA-<br>197, DT-198                            | ARG-E:72, ARG-E:79, GLN-E:68,<br>LEU-E:65, LEU-F:22, LYS-F:20,<br>HIS-F:18, SER-E:86                                             |
| 48 | -9.1  | DNA/Histone | None                                                              | DA-261, DC-260, DA-<br>259                                    | ARG-C:35, LYS-C:36, ASN-C:38,<br>SER-C:40, GLU-C:41, GLU-G:41,<br>SER-G:40, ASN-G:38, ARG-G:35                                   |
| 49 | -9.5  | Histone     | None                                                              | None                                                          | ASN-D:64, ARG-C:32, LEU-C:33,<br>LYS-C:36, GLY-C:37, ASN-C:38,<br>GLU-G:41, HIS-H:79, TYR-H:80,<br>LYS-H:82, ARG-H:83, SER-H:84  |
| 50 | -9.1  | Histone     | DC-132                                                            | None                                                          | ALA-G:69, ASP-G:72, ASN-G:73,<br>LYS-G:75, LEU-G:85, HIS-G:82,<br>ARG-G:81, PRO-G:80, ILE-G:79,<br>LYS-A:56, THR-A:58, GLU-A:59, |

|    |      |         |                                          |                                                | LYS-H:54, GLN-G:104                                                                                                                                                                           |
|----|------|---------|------------------------------------------|------------------------------------------------|-----------------------------------------------------------------------------------------------------------------------------------------------------------------------------------------------|
| 51 | -9.4 | DNA     | DA-41, DA-42, DA-43, DC-44, DT-45        | DT-252, DT-251, DT-250                         | None                                                                                                                                                                                          |
| 52 | -9.4 | DNA     | DA-19, DT-20, DT-21                      | DT-274, DA-273, DA-272, DG-271, DA-270, DT-269 | SER-D:33, SER-D:35, VAL-D:36                                                                                                                                                                  |
| 53 | -9.0 | DNA     | DC-3, DA-4, DA-5, DT-6, DA-7, DT-8, DC-9 | DA-287, DT-286, DA-285, DG-284, DG-283, DT-282 | None                                                                                                                                                                                          |
| 54 | -9.1 | Histone | None                                     | None                                           | GLU-E:105, ASN-C:110, LEU-C:108, VAL-C:107, ARG-C:88, ASN-C:94, LYS-C:95, LEU-C:97, GLY-C:98, ARG-C:99, ARG-A:134, GLU-A:133, GLY-A:132, ARG-A:131, GLN-B:93                                  |
| 55 | -9.0 | Histone | None                                     | DA-279                                         | GLN:C-104, ILE-C:79, ARG-C:81, HIS-C:82, LEU-C:85, GLU-E:59, THR-E:58, LYS-E:56, LYS-C:75, ASN-C:73, ASP-C:72, ALA-C:69, ASN-C:89                                                             |
| 56 | -9.6 | Histone | None                                     | None                                           | ARG-H:76, LYS-F:91, ASP-D:65, GLU-D:68, ARG-D:69, THR-F:96, ARG-C:99, LEU-C:96, LYS-C:95, ARG-B:92, GLN-B:93, ASN-B:64, ARG-B:67, ASP-B:68, ARG-D:96, LEU-D:97, LEU-D:98, LEU-D:99, PRO-D:100 |

|    |      |             |                                                      |                            |                                                                                                                                                              |
|----|------|-------------|------------------------------------------------------|----------------------------|--------------------------------------------------------------------------------------------------------------------------------------------------------------|
| 57 | -9.1 | DNA         | DT-112, DA-113,<br>DC-114, DA-115,<br>DC-116, DT-117 | DG-177                     | ARG-G:35                                                                                                                                                     |
| 58 | -9.7 | DNA/Histone | DC-9                                                 | None                       | ARG-E:53, LYS-E:56, ASN-C:73,<br>ASP-C:72                                                                                                                    |
| 59 | -9.0 | DNA         | DC-84, DA-85, DT-<br>86                              | DA-207, DC-206, DG-<br>205 | ARG-E:53, GLU-E:59                                                                                                                                           |
| 60 | -8.9 | Histone     | None                                                 | None                       | GLU-E:133, GLY-E:132, LYS-<br>G:95, LEU-H:98, ARG-H:69, GLU-<br>H:68, ARG-H:76, ARG-F:92, GLN-<br>F:93, GLY-F:94, ASN-F:64, PHE-<br>F:61, TYR-E:99           |
| 61 | -9.2 | DNA/Histone | None                                                 | DT-167, DT-166             | SER-H:35, SER-H:33, LYS-H:31,<br>GLY-B:101, MET-B:84, TYR-<br>B:88, MET-H:56, ASN-H:60, SER-<br>H:53, SER-H:52, ILE-H:51                                     |
| 62 | -9.9 | Histone     | None                                                 | None                       | ALA-E:135, ARG-E:134, GLU-<br>E:133, GLY-E:132, ARG-E:131,<br>GLY-F:94, GLN-F:93, ASN-G:94,<br>LYS-G:95, GLY-G:98, ARG-G:99,<br>GLY-B:94, ARG-B:92, LYS-B:91 |
| 63 | -9.2 | Histone     | None                                                 | None                       | LYS-G:95, ASN-G:94, GLU-G:91,<br>ARG-G:88, GLU-E:133, ARG-<br>E:134, ALA-E:135, GLN-G:84,<br>VAL-G:107, LEU-G:108, ASN-<br>G:110, GLU-A:105                  |

---

|    |      |     |                                   |                            |                                                                |
|----|------|-----|-----------------------------------|----------------------------|----------------------------------------------------------------|
| 64 | -8.9 | DNA | DA-110, DA-111,<br>DT-112, DA-113 | DT-180, DA-181, DT-<br>182 | VAL-G:43, GLY-G:44, ALA-G:45,<br>ARG-G:17, HIS-G:31, TYR-H:118 |
|----|------|-----|-----------------------------------|----------------------------|----------------------------------------------------------------|

---

**Movie S1:** 1  $\mu$ s trajectory of ligand free DNA dodecamer

**Movie S2:** 1  $\mu$ s trajectory of DNA dodecamer bound with Hoechst 33258

**Movie S3:** 1  $\mu$ s trajectory of DNA dodecamer bound with *ortho*-iodoHoechst

**Movie S4:** 1  $\mu$ s trajectory of DNA dodecamer bound with *meta*-iodoHoechst

**Movie S5:** 1  $\mu$ s trajectory of DNA dodecamer bound with *para*-iodoHoechst

**Movie S6:** 1  $\mu$ s trajectory of DNA dodecamer bound with phenylHoechst
